# Supplementary material
Source: PubMed Central journal article supplement (PMC6936088)
Supplement: oc9b00982_si_001.pdf [file oc9b00982_si_001.pdf]

## *Supporting Information*

# **Rational Design of a P2-Type Spherical Layered Oxide Cathode for High Performance Sodium Ion Batteries**

Jun Xiao,<sup>†</sup> Fan Zhang,<sup>‡</sup> Kaikai Tang,<sup>†</sup> Xiao Li,<sup>†</sup> Dandan Wang,<sup>†</sup> Yong Wang,<sup>\*†</sup> Hao Liu,<sup>\*†‡</sup> Minghong Wu<sup>\*†</sup> and Guoxiu Wang<sup>\*‡</sup>

<sup>†</sup> Joint International Laboratory on Environmental and Energy Frontier Materials, School of Environmental and Chemical Engineering, Shanghai University, Shanghai, 200444, China.  
Email: yongwang@shu.edu.cn; mhwu@shu.edu.cn

<sup>‡</sup> Centre for Clean Energy Technology, School of Mathematical and Physical Sciences, Faculty of Science, University of Technology Sydney, Broadway, Sydney, NSW 2007, Australia.  
Email: hao.liu@uts.edu.au; Guoxiu.Wang@uts.edu.au

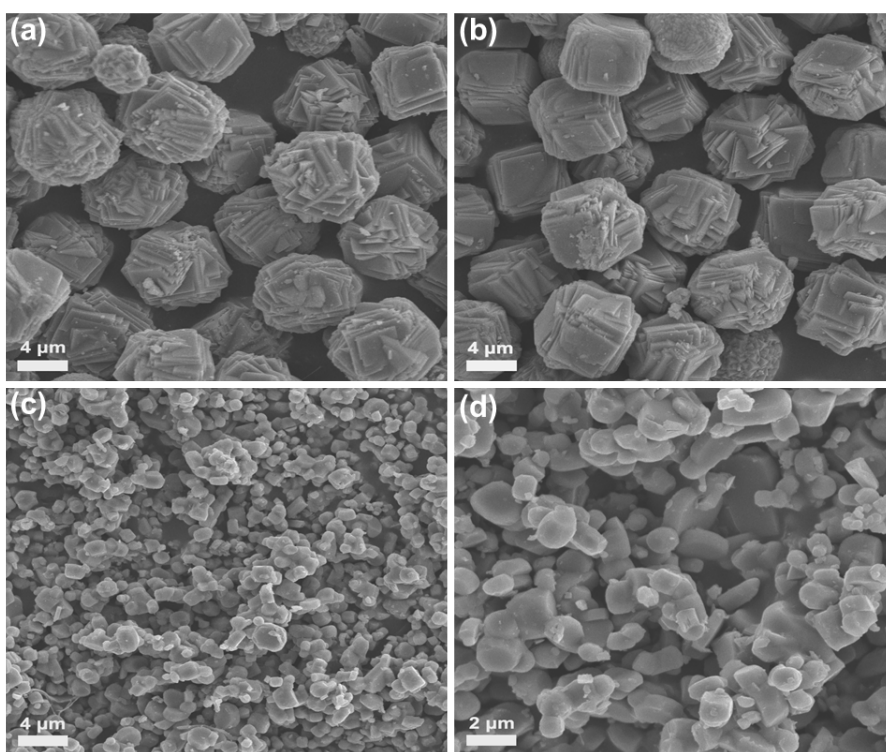

**Figure S1.** (a) SEM image of as-prepared Mn<sub>0.71</sub>Mg<sub>0.21</sub>Co<sub>0.08</sub>CO<sub>3</sub> precursor microspheres. (b) SEM image of 400 °C heat treatment intermediate. (c, d) SEM images of P2-Na<sub>0.66</sub>Li<sub>0.18</sub>Mn<sub>0.71</sub>Mg<sub>0.21</sub>Co<sub>0.08</sub>O<sub>2</sub> (i-NaLiMMCO) synthesized by co-precipitation method.

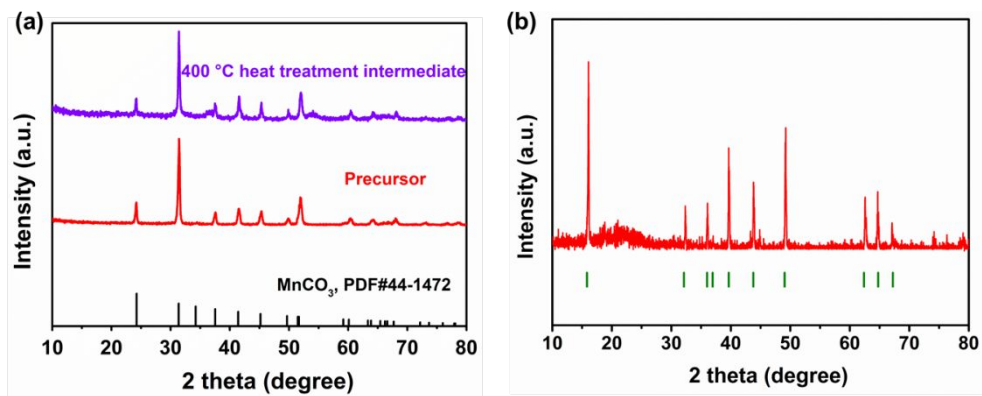

**Figure S2.** (a) XRD patterns of the  $\text{Mn}_{0.71}\text{Mg}_{0.21}\text{Co}_{0.08}\text{CO}_3$  precursor microspheres (red line) and 400 °C heat treatment intermediate (purple line). (b) XRD pattern of  $\text{P2-Na}_{0.66}\text{Li}_{0.18}\text{Mn}_{0.71}\text{Mg}_{0.21}\text{Co}_{0.08}\text{O}_2$  (i-NaLiMMCO) synthesized by co-precipitation method.

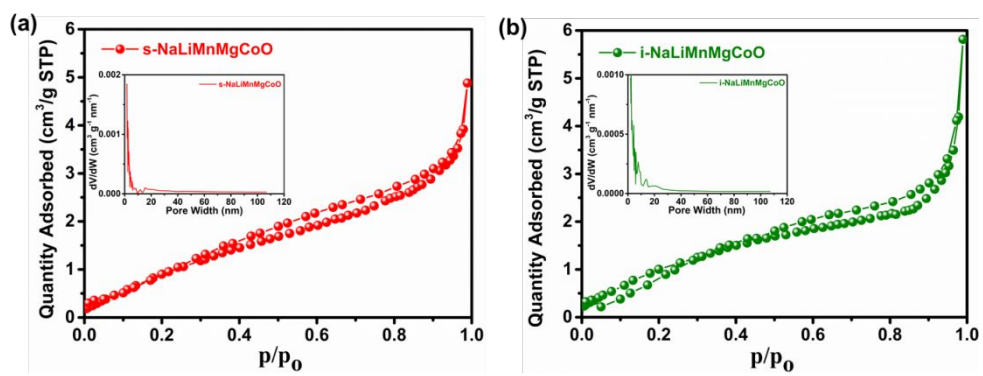

**Figure S3.** (a) N<sub>2</sub> adsorption/desorption isotherm of s-NaLiMnMgCoO. (b) N<sub>2</sub> adsorption/desorption isotherm of i-NaLiMnMgCoO.

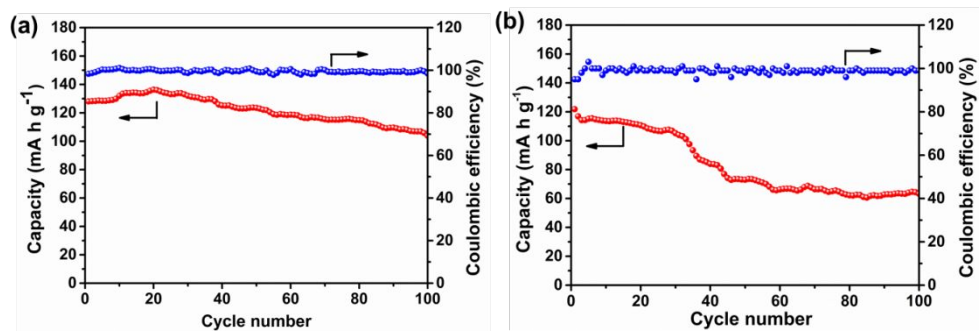

**Figure S4.** (a) The cycle performance of the s-NaLiMMCO at a rate of 100 mA g<sup>-1</sup>. (b) The cycle performance of the i-NaLiMMCO at a rate of 100 mA g<sup>-1</sup>.

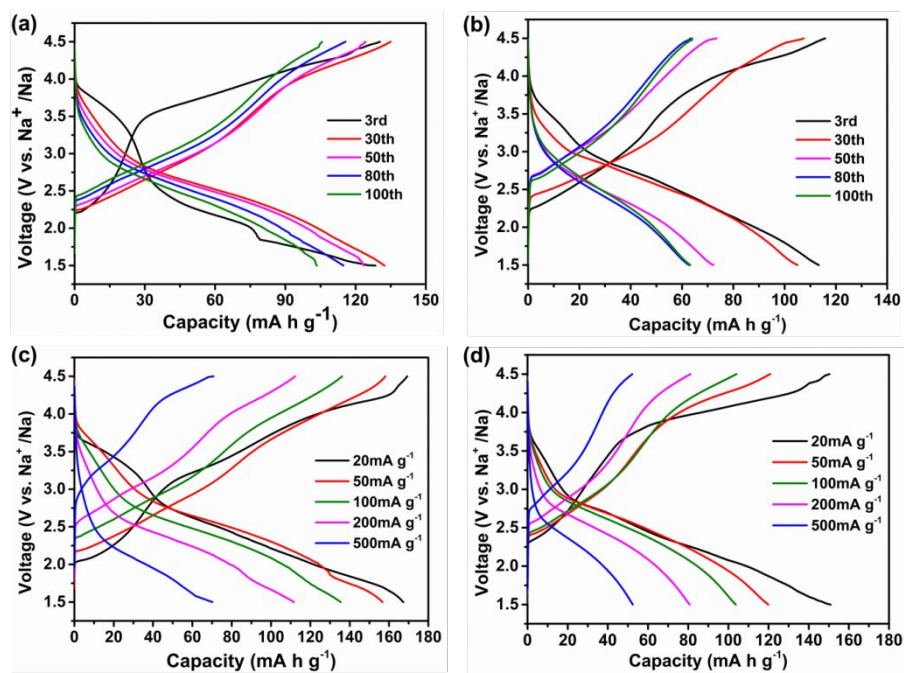

**Figure S5.** (a) The selected charge and discharge curves for s-NaLiMMCO at a rate of  $100 \text{ mA g}^{-1}$ . (b) The selected charge and discharge curves for i-NaLiMMCO at a rate of  $100 \text{ mA g}^{-1}$ . (c) Charge and discharge profiles at different rates for s-NaLiMMCO. (d) Charge and discharge profiles at different rates for i-NaLiMMCO.

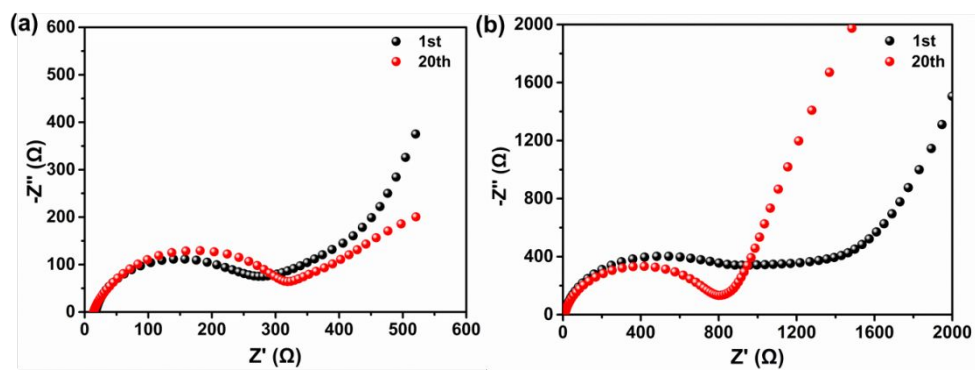

**Figure S6.** (a) The EIS spectra of the s-NaLiMMCO material for selected cycles at a rate of 20 mA  $g^{-1}$ . (b) The EIS spectra of the i-NaLiMMCO material for selected cycles at a rate of 20 mA  $g^{-1}$ .

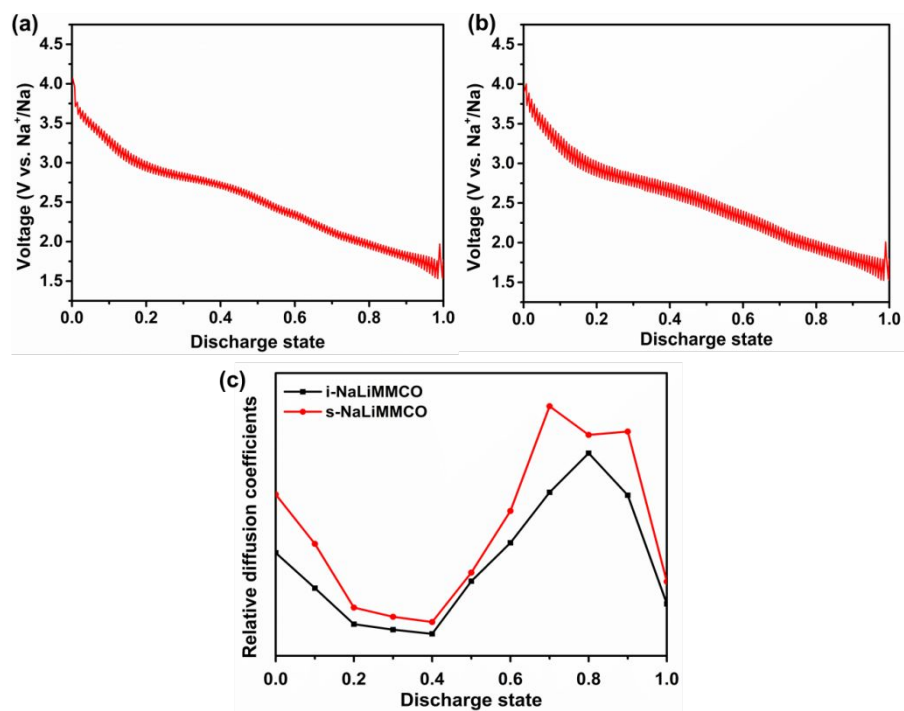

**Figure S7.** (a) GITT curves of s-NaLiMMCO. (b) GITT curves of i-NaLiMMCO. (c) The calculated Na chemical diffusion coefficients calculated from GITT measurement.



**Table S1.** ICP-OES results of solvothermal precursor

| Theoretical chemical formula                                  | Measured atomic ratio |      |      |
|---------------------------------------------------------------|-----------------------|------|------|
|                                                               | Mn                    | Mg   | Co   |
| $\text{Mn}_{0.71}\text{Mg}_{0.21}\text{Co}_{0.08}\text{CO}_3$ | 0.71                  | 0.20 | 0.08 |

**Table S2.** ICP-OES results of P2- $\text{Na}_{0.66}\text{Li}_{0.18}\text{Mn}_{0.71}\text{Mg}_{0.21}\text{Co}_{0.08}\text{O}_2$ 

| Theoretical chemical formula                                                                 | Measured atomic ratio |      |      |      |      |
|----------------------------------------------------------------------------------------------|-----------------------|------|------|------|------|
|                                                                                              | Na                    | Li   | Mn   | Mg   | Co   |
| $\text{Na}_{0.66}\text{Li}_{0.18}\text{Mn}_{0.71}\text{Mg}_{0.21}\text{Co}_{0.08}\text{O}_2$ | 0.65                  | 0.18 | 0.69 | 0.20 | 0.07 |

**Table S3.** Electrochemical performance comparison for P2-type Mn-based cathode material.

| Cathode materials                                                                                                             | Voltage range | Initial capacity<br>(mA h g <sup>-1</sup> ) | Capacity retention | Ref.      |
|-------------------------------------------------------------------------------------------------------------------------------|---------------|---------------------------------------------|--------------------|-----------|
| Na <sub>0.66</sub> Li <sub>0.18</sub> Mn <sub>0.71</sub> Mg <sub>0.21</sub> Co <sub>0.08</sub> O <sub>2</sub>                 | 1.5-4.5V      | 166/20 mA g <sup>-1</sup>                   | 82% (100 cycle)    | This work |
| Na <sub>0.78</sub> Ni <sub>0.23</sub> Mn <sub>0.69</sub> O <sub>2</sub>                                                       | 2.0-4.5V      | 138/0.1C                                    | 90% (20 cycle)     | 1         |
| Na <sub>2/3</sub> Fe <sub>1/2</sub> Mn <sub>1/2</sub> O <sub>2</sub>                                                          | 1.5-4.3V      | 126/13 mA g <sup>-1</sup>                   | 83% (30 cycle)     | 2         |
| Na <sub>0.67</sub> Ni <sub>0.29</sub> Co <sub>0.13</sub> Mn <sub>0.58</sub> O <sub>2</sub>                                    | 2.0-4.3V      | 164.2/16 mA g <sup>-1</sup>                 | 77.4% (100 cycle)  | 3         |
| Na <sub>2/3</sub> Ni <sub>1/3</sub> Mn <sub>5/9</sub> Al <sub>1/9</sub> O <sub>2</sub>                                        | 1.6-4.0V      | 118/0.1C                                    | 77.5% (100 cycle)  | 4         |
| Na <sub>0.7</sub> [Cu <sub>x</sub> Fe <sub>y</sub> Mn <sub>1-x-y</sub> ]O <sub>2</sub>                                        | 2.5–4.2V      | 97.8/0.1C                                   | 82% (80 cycle)     | 5         |
| Na <sub>2/3</sub> Fe <sub>1/2</sub> Mn <sub>1/2</sub> O <sub>2</sub>                                                          | 1.5–4.2V      | 180 / 0.1C                                  | 55% (80 cycle)     | 6         |
| Na <sub>0.66</sub> Co <sub>x</sub> Mn <sub>0.66-x</sub> Ti <sub>0.34</sub> O <sub>2</sub>                                     | 2.0-4.3V      | 130/0.2C                                    | 81% (100 cycle)    | 7         |
| Na <sub>0.5</sub> [Ni <sub>0.23</sub> Fe <sub>0.13</sub> Mn <sub>0.63</sub> ]O <sub>2</sub>                                   | 1.5-4.6V      | 200/15 mA g <sup>-1</sup>                   | 75% (70 cycle)     | 8         |
| Na <sub>0.67</sub> Mn <sub>0.65</sub> Ni <sub>0.2</sub> Co <sub>0.15</sub> O <sub>2</sub>                                     | 1.5-4.2V      | 155/12 mA g <sup>-1</sup>                   | 85% (100 cycle)    | 9         |
| Na <sub>0.67</sub> Mn <sub>0.65</sub> Fe <sub>0.2</sub> Ni <sub>0.15</sub> O <sub>2</sub>                                     | 1.5-4.5V      | 204/0.05C                                   | 71% (50 cycle)     | 10        |
| Na <sub>2/3</sub> Ni <sub>1/3-x</sub> Mg <sub>x</sub> Mn <sub>2/3</sub> O <sub>2</sub>                                        | 2.0-4.5V      | 150/10 mA g <sup>-1</sup>                   | 84% (50 cycle)     | 11        |
| Na <sub>2/3</sub> (Mn <sub>1/2</sub> Fe <sub>1/4</sub> Co <sub>1/4</sub> )O <sub>2</sub>                                      | 1.5-4.5V      | 195/0.1C                                    | 71% (30 cycle)     | 12        |
| Na <sub>0.67</sub> Mn <sub>0.67</sub> Ni <sub>0.33-x</sub> Mg <sub>x</sub> O <sub>2</sub>                                     | 2.5-4.35V     | 123/17 mA g <sup>-1</sup>                   | 85% (50 cycle)     | 13        |
| Na <sub>0.66</sub> Ni <sub>0.26</sub> Zn <sub>0.07</sub> Mn <sub>0.67</sub> O <sub>2</sub>                                    | 2.0-4.4V      | 132/12 mA g <sup>-1</sup>                   | 89% (30 cycle)     | 14        |
| Na <sub>0.67</sub> Ni <sub>0.2</sub> Cu <sub>0.1</sub> Mn <sub>0.7</sub> O <sub>2</sub>                                       | 2.0-4.5V      | 125.3/17 mA g <sup>-1</sup>                 | 72% (100 cycle)    | 15        |
| Na <sub>0.44</sub> Mn <sub>0.6</sub> Ni <sub>0.4-x</sub> Cu <sub>x</sub> O <sub>2</sub>                                       | 1.5-4.0V      | 149.2/17 mA g <sup>-1</sup>                 | 80% (50 cycle)     | 16        |
| Na <sub>0.67</sub> Mn <sub>0.8</sub> Ni <sub>0.1</sub> Mg <sub>0.1</sub> O <sub>2</sub>                                       | 1.5-4.2V      | 171/0.05C                                   | 79% (50 cycle)     | 17        |
| Na <sub>0.67</sub> Li <sub>0.2</sub> (Ni <sub>0.2</sub> Fe <sub>0.15</sub> Mn <sub>0.65</sub> ) <sub>0.8</sub> O <sub>2</sub> | 1.5-4.3V      | 151/0.1C                                    | 78% (50 cycle)     | 18        |

## References

- (1) Ma, C.; Alvarado, J.; Xu, J.; Clement, R. J.; Kodur, M.; Tong, W.; Grey, C. P.; Meng, Y. S. Exploring oxygen activity in the high energy P2-type  $\text{Na}_{0.78}\text{Ni}_{0.23}\text{Mn}_{0.69}\text{O}_2$  cathode material for Na-ion batteries. *J. Am. Chem. Soc.* **2017**, *139*, 4835-4845.
- (2) Bai, Y.; Zhao, L.; Wu, C.; Li, H.; Li, Y.; Wu, F. Enhanced sodium ion storage behavior of P2-type  $\text{Na}_{2/3}\text{Fe}_{1/2}\text{Mn}_{1/2}\text{O}_2$  synthesized via a chelating agent assisted route. *ACS Appl. Mater. Interfaces* **2016**, *8*, 2857-2865.
- (3) Hou, P.; Li, F.; Wang, Y.; Yin, J.; Xu, X. Mitigating the P2–O2 phase transition of high-voltage P2- $\text{Na}_{2/3}[\text{Ni}_{1/3}\text{Mn}_{2/3}]\text{O}_2$  cathodes by cobalt gradient substitution for high-rate sodium-ion batteries. *J. Mater. Chem. A* **2019**, *7*, 4705-4713.
- (4) Zhang, X. H.; Pang, W. L.; Wan, F.; Guo, J. Z.; Lu, H. Y.; Li, J. Y.; Xing, Y. M.; Zhang, J. P.; Wu, X. L. P2- $\text{Na}_{2/3}\text{Ni}_{1/3}\text{Mn}_{5/9}\text{Al}_{1/9}\text{O}_2$  microparticles as superior cathode material for sodium-ion batteries: enhanced properties and mechanism via graphene connection. *ACS Appl. Mater. Interfaces* **2016**, *8*, 20650-20659.
- (5) Xu, S.; Wu, J.; Hu, E.; Li, Q.; Zhang, J.; Wang, Y.; Stavitski, E.; Jiang, L.; Rong, X.; Yu, X.; Yang, W.; Yang, X.-Q.; Chen, L.; Hu, Y.-S. Suppressing the voltage decay of low-cost P2-type iron-based cathode materials for sodium-ion batteries. *J. Mater. Chem. A* **2018**, *6*, 20795-20803.
- (6) Pang, W. K.; Kalluri, S.; Peterson, V. K.; Sharma, N.; Kimpton, J.; Johannessen, B.; Liu, H. K.; Dou, S. X.; Guo, Z. Interplay between electrochemistry and phase evolution of the P2-type  $\text{Na}_x(\text{Fe}_{1/2}\text{Mn}_{1/2})\text{O}_2$  cathode for use in sodium-ion batteries. *Chem. Mater.* **2015**, *27*, 3150-3158.
- (7) Wang, Q. C.; Hu, E.; Pan, Y.; Xiao, N.; Hong, F.; Fu, Z. W.; Wu, X. J.; Bak, S. M.; Yang, X. Q.; Zhou, Y. N., Utilizing  $\text{Co}^{2+}/\text{Co}^{3+}$  redox couple in P2-layered  $\text{Na}_{0.66}\text{Co}_{0.22}\text{Mn}_{0.44}\text{Ti}_{0.34}\text{O}_2$  cathode for sodium-ion batteries. *Adv. Sci.* **2017**, *4*, 1700219.
- (8) Hasa, I.; Buchholz, D.; Passerini, S.; Scrosati, B.; Hassoun, J. High performance  $\text{Na}_{0.5}[\text{Ni}_{0.23}\text{Fe}_{0.13}\text{Mn}_{0.63}]\text{O}_2$  cathode for sodium-ion batteries. *Adv. Energy Mater.* **2014**, *4*, 1400083.
- (9) Li, Z.-Y.; Gao, R.; Sun, L.; Hu, Z.; Liu, X. Designing an advanced P2- $\text{Na}_{0.67}\text{Mn}_{0.65}\text{Ni}_{0.2}\text{Co}_{0.15}\text{O}_2$  layered cathode material for Na-ion batteries. *J. Mater. Chem. A* **2015**, *3*, 16272-16278.
- (10) Yuan, D.; Hu, X.; Qian, J.; Pei, F.; Wu, F.; Mao, R.; Ai, X.; Yang, H.; Cao, Y. P2-type  $\text{Na}_{0.67}\text{Mn}_{0.65}\text{Fe}_{0.2}\text{Ni}_{0.15}\text{O}_2$  cathode material with high-capacity for sodium-ion battery. *Electrochim.*

*Acta* **2014**, *116*, 300-305.

(11) Tapia-Ruiz, N.; Dose, W. M.; Sharma, N.; Chen, H.; Heath, J.; Somerville, J. W.; Maitra, U.; Islam, M. S.; Bruce, P. G. High voltage structural evolution and enhanced Na-ion diffusion in P2- $\text{Na}_{2/3}\text{Ni}_{1/3-x}\text{Mg}_x\text{Mn}_{2/3}\text{O}_2$  ( $0 \leq x \leq 0.2$ ) cathodes from diffraction, electrochemical and ab initio studies. *Energy Environ. Sci.* **2018**, *11*, 1470-1479.

(12) Liu, L.; Li, X.; Bo, S.-H.; Wang, Y.; Chen, H.; Twu, N.; Wu, D.; Ceder, G. High-performance P2-type  $\text{Na}_{2/3}(\text{Mn}_{1/2}\text{Fe}_{1/4}\text{Co}_{1/4})\text{O}_2$  cathode material with superior rate capability for Na-ion batteries. *Adv. Energy Mater.* **2015**, *5*, 1500944.

(13) Wang, P. F.; You, Y.; Yin, Y. X.; Wang, Y. S.; Wan, L. J.; Gu, L.; Guo, Y. G. Suppressing the P2-O2 phase transition of  $\text{Na}_{0.67}\text{Mn}_{0.67}\text{Ni}_{0.33}\text{O}_2$  by magnesium substitution for improved sodium-ion batteries. *Angew. Chem., Int. Ed.* **2016**, *55*, 7445-7449.

(14) Wu, X.; Guo, J.; Wang, D.; Zhong, G.; McDonald, M. J.; Yang, Y. P2-type  $\text{Na}_{0.66}\text{Ni}_{0.33-x}\text{Zn}_x\text{Mn}_{0.67}\text{O}_2$  as new high-voltage cathode materials for sodium-ion batteries. *J. Power Sources* **2015**, *281*, 18-26.

(15) Wang, L.; Sun, Y.-G.; Hu, L.-L.; Piao, J.-Y.; Guo, J.; Manthiram, A.; Ma, J.; Cao, A.-M. Copper-substituted  $\text{Na}_{0.67}\text{Ni}_{0.3-x}\text{Cu}_x\text{Mn}_{0.7}\text{O}_2$  cathode materials for sodium-ion batteries with suppressed P2-O2 phase transition. *J. Mater. Chem. A* **2017**, *5*, 8752-8761.

(16) Chen, T.; Liu, W.; Gao, H.; Zhuo, Y.; Hu, H.; Chen, A.; Zhang, J.; Yan, J.; Liu, K. A P2-type  $\text{Na}_{0.44}\text{Mn}_{0.6}\text{Ni}_{0.3}\text{Cu}_{0.1}\text{O}_2$  cathode material with high energy density for sodium-ion batteries. *J. Mater. Chem. A* **2018**, *6*, 12582-12588.

(17) Li, Z.-Y.; Gao, R.; Zhang, J.; Zhang, X.; Hu, Z.; Liu, X. New insights into designing high-rate performance cathode materials for sodium ion batteries by enlarging the slab-spacing of the Na-ion diffusion layer. *J. Mater. Chem. A* **2016**, *4*, 3453-3461.

(18) Wang, Y.; Hu, G.; Peng, Z.; Cao, Y.; Lai, X.; Qi, X.; Gan, Z.; Li, W.; Luo, Z.; Du, K. Influence of Li substitution on the structure and electrochemical performance of P2-type  $\text{Na}_{0.67}\text{Ni}_{0.2}\text{Fe}_{0.15}\text{Mn}_{0.65}\text{O}_2$  cathode materials for sodium ion batteries. *J. Power Sources* **2018**, *396*, 639-647.
